# Supplementary material for: Prolonged Culture of Aligned Skeletal Myotubes on Micromolded Gelatin Hydrogels
Source: PubMed Central journal article supplement (PMC4924097; doi:10.1038/srep28855), 2016-06-28
Supplement: srep28855-s1.pdf [file srep28855-s1.pdf]

**Supplementary Information for:**

**Prolonged Culture of Aligned Skeletal Myotubes on Micromolded Gelatin Hydrogels**

Archana Bettadapur<sup>1,2</sup>, Gio C. Suh<sup>1,2</sup>, Nicholas A. Geisse<sup>3</sup>, Evelyn R. Wang<sup>1,4</sup>, Clara Hua<sup>1</sup>, Holly A. Huber<sup>1</sup>, Alyssa A. Viscio<sup>1</sup>, Joon Young Kim<sup>1</sup>, Julie B. Strickland<sup>1</sup>, Megan L. McCain<sup>\*1,5</sup>

<sup>1</sup>Laboratory for Living Systems Engineering, Department of Biomedical Engineering, USC Viterbi School of Engineering, University of Southern California, Los Angeles, CA 90089

<sup>2</sup>These authors contributed equally to this work

<sup>3</sup>Oxford Instruments Asylum Research, Santa Barbara, CA 93117

<sup>4</sup>Keck School of Medicine of USC, University of Southern California, Los Angeles, CA 90033

<sup>5</sup>Department of Stem Cell Biology and Regenerative Medicine, Keck School of Medicine of USC, University of Southern California, Los Angeles, CA 90033

\* Corresponding Author:

Megan L. McCain  
USC Viterbi School of Engineering  
1042 Downey Way, DRB 140  
Los Angeles, CA 90089  
Phone: 213-821-0791  
Email: [mlmccain@usc.edu](mailto:mlmccain@usc.edu)

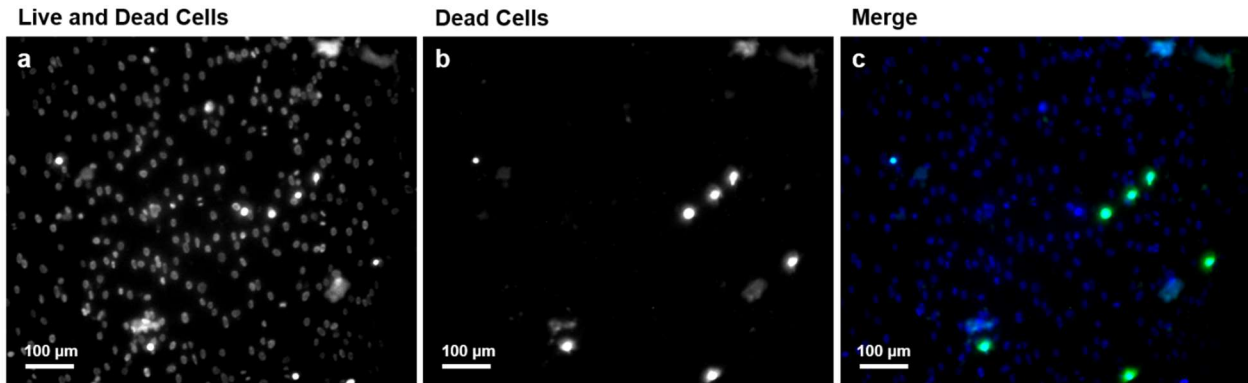

**Supplementary Figure 1. Cell Viability on  $\mu$ molded Gelatin Hydrogels.** Representative image of C2C12 skeletal myoblasts cultured on  $\mu$ molded gelatin hydrogels for one day and stained to quantify cell viability. Cells were stained to identify live and dead cells (a) and dead cells only (b). (c) Merged image shows live and dead cells in blue and dead cells in green.

**Supplementary Table S1. Statistical analysis for compressive elastic moduli of gelatin hydrogels cross-linked with MTG.** All data was normally distributed, as determined by the Lilliefors test. The  $p$ -value for one-way analysis of variance (ANOVA) was  $1.7 \times 10^{-5}$ . Multiple comparisons were performed using Tukey's test, with the  $p$ -values indicated in the table below.

| Comparison                          | $p$ -value |
|-------------------------------------|------------|
| No MTG vs 10% MTG 4 hours           | <0.03      |
| 10% MTG 4 hours vs 10% MTG 24 hours | <0.001     |
| No MTG vs 10% MTG 24 hours          | <0.0001    |

**Supplementary Table S2. Statistical analysis for dry mass of  $\mu$ molded gelatin hydrogel constructs.** All data was not normally distributed, as determined by the Lilliefors test. The  $p$ -value for the Kruskal-Wallis test was  $8.4 \times 10^{-4}$ . Multiple comparisons were performed using Tukey's test, with the  $p$ -values indicated in the table below.

| Comparison      | $p$ -value |
|-----------------|------------|
| 0 day vs 1 day  | <0.001     |
| 0 day vs 7 days | <0.03      |
| 1 day vs 7 days | NS         |

**Supplementary Table S3. Statistical analysis for wet mass of  $\mu$ molded gelatin hydrogel constructs.** Data was not normally distributed, as determined by the Lilliefors test. The  $p$ -value for the Kruskal-Wallis test was 0.0011. Multiple comparisons were performed using Tukey's test, with the  $p$ -values indicated in the table below.

| Comparison      | $p$ -value |
|-----------------|------------|
| 0 day vs 1 day  | <0.005     |
| 0 day vs 7 days | <0.01      |
| 1 day vs 7 days | NS         |

**Supplementary Table S4. Statistical analysis for total nuclei in  $\mu$ patterned tissues.** All data was not normally distributed, as determined by the Lilliefors test. The  $p$ -value for the Kruskal-Wallis test was  $1.1 \times 10^{-8}$ . Multiple comparisons were performed using Tukey's test, with  $p$ -values for statistical differences indicated in the table below.

| Comparison                                                         | $p$ -value |
|--------------------------------------------------------------------|------------|
| Wk1 FN- $\mu$ printed PDMS vs Wk3 FN- $\mu$ printed PDMS           | NS         |
| Wk1 FN- $\mu$ printed PDMS vs Wk1 FN- $\mu$ printed soft PDMS      | <0.02      |
| Wk1 FN- $\mu$ printed PDMS vs Wk3 FN- $\mu$ printed soft PDMS      | NS         |
| Wk1 FN- $\mu$ printed PDMS vs Wk1 $\mu$ molded gelatin             | <0.00001   |
| Wk1 FN- $\mu$ printed PDMS vs Wk3 $\mu$ molded gelatin             | <0.00001   |
| Wk3 FN- $\mu$ printed PDMS vs Wk1 FN- $\mu$ printed soft PDMS      | NS         |
| Wk3 FN- $\mu$ printed PDMS vs Wk3 FN- $\mu$ printed soft PDMS      | NS         |
| Wk3 FN- $\mu$ printed PDMS vs Wk1 $\mu$ molded gelatin             | <0.03      |
| Wk3 FN- $\mu$ printed PDMS vs Wk3 $\mu$ molded gelatin             | <0.01      |
| Wk1 FN- $\mu$ printed soft PDMS vs Wk3 FN- $\mu$ printed soft PDMS | NS         |
| Wk1 FN- $\mu$ printed soft PDMS vs Wk1 $\mu$ molded gelatin        | NS         |
| Wk1 FN- $\mu$ printed soft PDMS vs Wk3 $\mu$ molded gelatin        | NS         |
| Wk3 FN- $\mu$ printed soft PDMS vs Wk1 $\mu$ molded gelatin        | NS         |
| Wk3 FN- $\mu$ printed soft PDMS vs Wk3 $\mu$ molded gelatin        | NS         |
| Wk1 $\mu$ molded gelatin vs Wk3 $\mu$ molded gelatin               | NS         |

**Supplementary Table S5. Statistical analysis for total nuclei in isotropic tissues.** All data was not normally distributed, as determined by the Lilliefors test. The  $p$ -value for the Kruskal-Wallis test was  $5.9 \times 10^{-9}$ . Multiple comparisons were performed using Tukey's test, with  $p$ -values for statistical differences indicated in the table below.

| Comparison                                               | $p$ -value |
|----------------------------------------------------------|------------|
| Wk1 FN-isotropic PDMS vs Wk3 FN-isotropic PDMS           | NS         |
| Wk1 FN-isotropic PDMS vs Wk1 FN-isotropic soft PDMS      | <0.02      |
| Wk1 FN-isotropic PDMS vs Wk3 FN-isotropic soft PDMS      | NS         |
| Wk1 FN-isotropic PDMS vs Wk1 isotropic gelatin           | <0.00001   |
| Wk1 FN-isotropic PDMS vs Wk3 isotropic gelatin           | <0.00001   |
| Wk3 FN-isotropic PDMS vs Wk1 FN-isotropic soft PDMS      | NS         |
| Wk3 FN-isotropic PDMS vs Wk3 FN-isotropic soft PDMS      | NS         |
| Wk3 FN-isotropic PDMS vs Wk1 isotropic gelatin           | <0.01      |
| Wk3 FN-isotropic PDMS vs Wk3 isotropic gelatin           | <0.01      |
| Wk1 FN-isotropic soft PDMS vs Wk3 FN-isotropic soft PDMS | NS         |
| Wk1 FN-isotropic soft PDMS vs Wk1 isotropic gelatin      | NS         |
| Wk1 FN-isotropic soft PDMS vs Wk3 isotropic gelatin      | NS         |
| Wk3 FN-isotropic soft PDMS vs Wk1 isotropic gelatin      | NS         |
| Wk3 FN-isotropic soft PDMS vs Wk3 isotropic gelatin      | NS         |
| Wk1 isotropic gelatin vs Wk3 isotropic gelatin           | NS         |

**Supplementary Table S6. Statistical analysis for myogenic index in  $\mu$ patterned tissues.** All data was not normally distributed, as determined by the Lilliefors test. The  $p$ -value for the Kruskal-Wallis test was 0.01. Multiple comparisons were performed using Tukey's test, with  $p$ -values for statistical differences indicated in the table below.

| Comparison                                                         | $p$ -value |
|--------------------------------------------------------------------|------------|
| Wk1 FN- $\mu$ printed soft PDMS vs Wk1 $\mu$ molded gelatin        | NS         |
| Wk3 FN- $\mu$ printed soft PDMS vs Wk3 $\mu$ molded gelatin        | <0.03      |
| Wk1 FN- $\mu$ printed soft PDMS vs Wk3 $\mu$ molded gelatin        | NS         |
| Wk3 FN- $\mu$ printed soft PDMS vs Wk1 $\mu$ molded gelatin        | <0.03      |
| Wk1 FN- $\mu$ printed soft PDMS vs Wk3 FN- $\mu$ printed soft PDMS | NS         |
| Wk1 $\mu$ molded gelatin vs Wk3 $\mu$ molded gelatin               | NS         |

**Supplementary Table S7. Statistical analysis for myogenic index in isotropic tissues.** All data was not normally distributed, as determined by the Lilliefors test. The  $p$ -value for the Kruskal-Wallis test was  $7.0 \times 10^{-4}$ . Multiple comparisons were performed using Tukey's test, with  $p$ -values for statistical differences indicated in the table below.

| Comparison                                               | $p$ -value |
|----------------------------------------------------------|------------|
| Wk1 FN-isotropic soft PDMS vs Wk1 isotropic gelatin      | NS         |
| Wk3 FN-isotropic soft PDMS vs Wk3 isotropic gelatin      | <0.03      |
| Wk1 FN-isotropic soft PDMS vs Wk3 isotropic gelatin      | NS         |
| Wk3 FN-isotropic soft PDMS vs Wk1 isotropic gelatin      | <0.01      |
| Wk1 FN-isotropic soft PDMS vs Wk3 FN-isotropic soft PDMS | NS         |
| Wk1 isotropic gelatin vs Wk3 isotropic gelatin           | NS         |

**Supplementary Table S8. Statistical analysis for myotube width in  $\mu$ patterned tissues.** All data was not normally distributed, as determined by the Lilliefors test. The  $p$ -value for the Kruskal-Wallis test was 0.01. Multiple comparisons were performed using Tukey's test, with  $p$ -values for statistical differences indicated in the table below.

| Comparison                                                         | $p$ -value |
|--------------------------------------------------------------------|------------|
| Wk1 FN- $\mu$ printed soft PDMS vs Wk1 $\mu$ molded gelatin        | NS         |
| Wk3 FN- $\mu$ printed soft PDMS vs Wk3 $\mu$ molded gelatin        | <0.01      |
| Wk1 FN- $\mu$ printed soft PDMS vs Wk3 $\mu$ molded gelatin        | NS         |
| Wk3 FN- $\mu$ printed soft PDMS vs Wk1 $\mu$ molded gelatin        | NS         |
| Wk1 FN- $\mu$ printed soft PDMS vs Wk3 FN- $\mu$ printed soft PDMS | NS         |
| Wk1 $\mu$ molded gelatin vs Wk3 $\mu$ molded gelatin               | NS         |

**Supplementary Table S9. Statistical analysis for myotube width in isotropic tissues.** All data was not normally distributed, as determined by the Lilliefors test. The  $p$ -value for the Kruskal-Wallis test was  $3.4 \times 10^{-4}$ . Multiple comparisons were performed using Tukey's test, with  $p$ -values for statistical differences indicated in the table below.

| Comparison                                               | $p$ -value |
|----------------------------------------------------------|------------|
| Wk1 FN-isotropic soft PDMS vs Wk1 isotropic gelatin      | NS         |
| Wk3 FN-isotropic soft PDMS vs Wk3 isotropic gelatin      | <0.001     |
| Wk1 FN-isotropic soft PDMS vs Wk3 isotropic gelatin      | <0.02      |
| Wk3 FN-isotropic soft PDMS vs Wk1 isotropic gelatin      | <0.03      |
| Wk1 FN-isotropic soft PDMS vs Wk3 FN-isotropic soft PDMS | NS         |
| Wk1 isotropic gelatin vs Wk3 isotropic gelatin           | NS         |

**Supplementary Table S10. Statistical analysis for myotube length in  $\mu$ patterned tissues.** All data was not normally distributed, as determined by the Lilliefors test. The  $p$ -value for the Kruskal-Wallis test was  $1.3 \times 10^{-5}$ . Multiple comparisons were performed using Tukey's test, with  $p$ -values for statistical differences indicated in the table below.

| Comparison                                                         | $p$ -value |
|--------------------------------------------------------------------|------------|
| Wk1 FN- $\mu$ printed soft PDMS vs Wk1 $\mu$ molded gelatin        | <0.05      |
| Wk3 FN- $\mu$ printed soft PDMS vs Wk3 $\mu$ molded gelatin        | <0.0001    |
| Wk1 FN- $\mu$ printed soft PDMS vs Wk3 $\mu$ molded gelatin        | <0.01      |
| Wk3 FN- $\mu$ printed soft PDMS vs Wk1 $\mu$ molded gelatin        | <0.001     |
| Wk1 FN- $\mu$ printed soft PDMS vs Wk3 FN- $\mu$ printed soft PDMS | NS         |
| Wk1 $\mu$ molded gelatin vs Wk3 $\mu$ molded gelatin               | NS         |

**Supplementary Table S11. Statistical analysis for myotube length in isotropic tissues.** All data was not normally distributed, as determined by the Lilliefors test. The  $p$ -value for the Kruskal-Wallis test was  $2.0 \times 10^{-5}$ . Multiple comparisons were performed using Tukey's test, with  $p$ -values for statistical differences indicated in the table below.

| Comparison                                               | $p$ -value |
|----------------------------------------------------------|------------|
| Wk1 FN-isotropic soft PDMS vs Wk1 isotropic gelatin      | <0.01      |
| Wk3 FN-isotropic soft PDMS vs Wk3 isotropic gelatin      | <0.01      |
| Wk1 FN-isotropic soft PDMS vs Wk3 isotropic gelatin      | NS         |
| Wk3 FN-isotropic soft PDMS vs Wk1 isotropic gelatin      | <0.0001    |
| Wk1 FN-isotropic soft PDMS vs Wk3 FN-isotropic soft PDMS | NS         |
| Wk1 isotropic gelatin vs Wk3 isotropic gelatin           | NS         |

**Supplementary Table S12. Statistical analysis for myotube alignment on  $\mu$ molded gelatin hydrogels.** All data was normally distributed, as determined by the Lilliefors test. The  $p$ -value for one-way analysis of variance (ANOVA) was  $9.3 \times 10^{-6}$ . Multiple comparisons were performed using Tukey's test, with the  $p$ -values indicated in the table below.

| <b>Comparison</b>                                    | <b><math>p</math>-value</b> |
|------------------------------------------------------|-----------------------------|
| Wk1 isotropic gelatin vs Wk3 isotropic gelatin       | NS                          |
| Wk1 isotropic gelatin vs Wk1 $\mu$ molded gelatin    | <0.001                      |
| Wk1 isotropic gelatin vs Wk3 $\mu$ molded gelatin    | <0.01                       |
| Wk3 isotropic gelatin vs Wk1 $\mu$ molded gelatin    | <0.001                      |
| Wk3 isotropic gelatin vs Wk3 $\mu$ molded gelatin    | <0.01                       |
| Wk1 $\mu$ molded gelatin vs Wk3 $\mu$ molded gelatin | NS                          |
